# Supplementary material for: Renewable fuels from biomass-derived compounds: Ru-containing hydrotalcites as catalysts for conversion of HMF to 2,5-dimethylfuran
Source: Royal Society of Chemistry journal article supplement (doi:10.1039/c4cy01376j), 2014-11-25
Supplement: c4cy01376j1.pdf [file c4cy01376j1.pdf]

## Electronic Supplementary Information (ESI)

### Renewable fuels from biomass-derived compounds: Ru containing hydrotalcites as catalysts for 2,5-dimethylfuran from HMF

Atul S. Nagpure, Ashok Kumar Venugopal, Nishita Lucas, Marimuthu Manikandan, Raja Thirumalaiswamy\* and Satyanarayana Chilukuri\*

Catalysis Division, CSIR- National Chemical Laboratory,  
Dr. Homi Bhabha Road, Pune-411008, India,  
Tel.: +91-20-25902019; Fax: +91-20-25902633.  
E-mail: [sv.chilukuri@ncl.res.in](mailto:sv.chilukuri@ncl.res.in) (Dr. Satyanarayana Chilukuri)  
[t.raja@ncl.res.in](mailto:t.raja@ncl.res.in) (Dr. T. Raja)

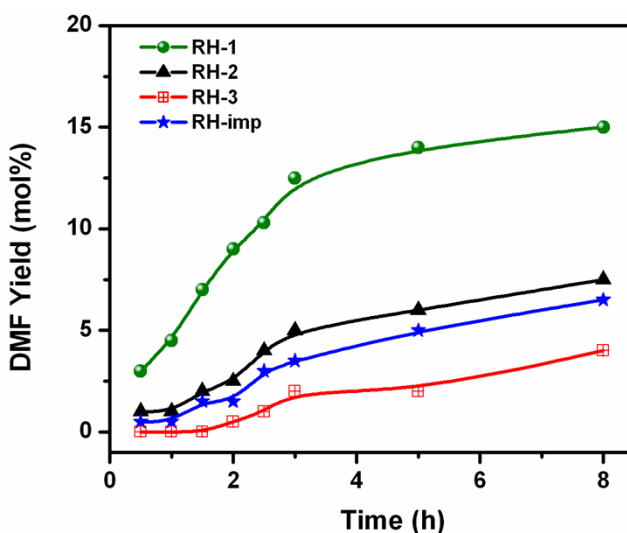

**Fig. S1** Yield of DMF on various catalysts in the absence of hydrogen.

Reaction conditions: HMF (1 mmol, 126 mg); catalyst (50 mg); temperature (220 °C); solvent (2-propanol, 25 mL); N<sub>2</sub> pressure (5 bar); stirring speed (500 rpm).

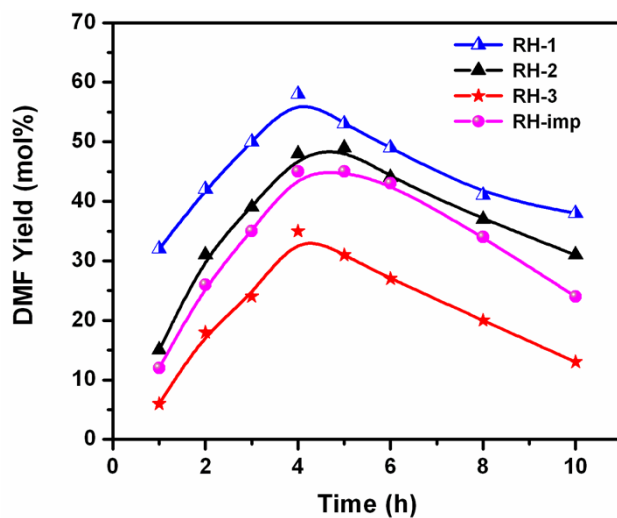

**Fig. S2** DMF yields over various catalysts as a result of CTH plus hydrogenation under H<sub>2</sub> pressure. Reaction conditions: HMF (1 mmol, 126 mg); catalyst (50 mg); temperature (220 °C); H<sub>2</sub> pressure (10 bar); solvent (2-propanol, 25 mL); stirring speed (500 rpm).

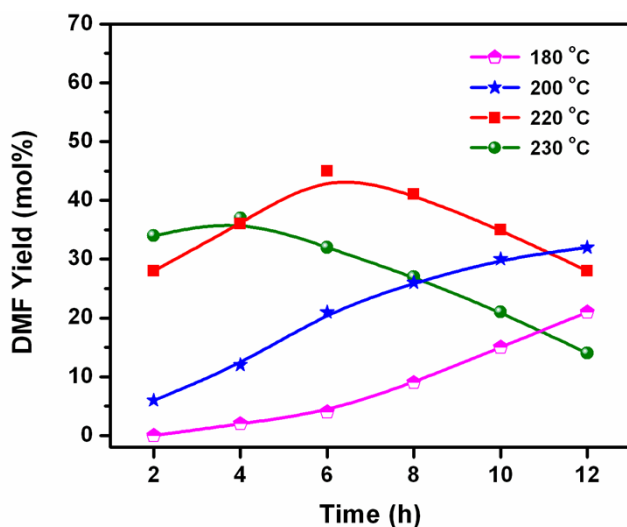

**Fig. S3** Effect of reaction temperature on DMF yield under non-CTH conditions over RH-1 catalyst. Reaction conditions: HMF (1 mmol, 126 mg); catalyst (RH-1, 50 mg); H<sub>2</sub> pressure (10 bar); solvent (THF, 25 mL); stirring speed (500 rpm).

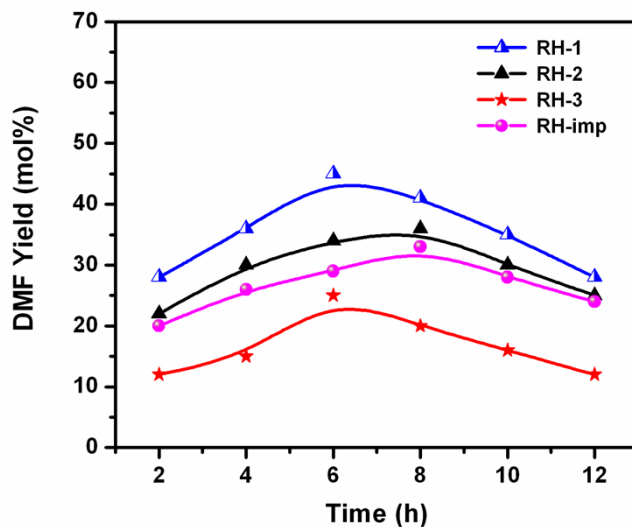

**Fig. S4** Effect of Ru content on DMF yield over various catalysts under non-CTH conditions. Reaction conditions: HMF (1 mmol, 126 mg); catalyst (50 mg); temperature (220 °C); H<sub>2</sub> pressure (10 bar); solvent (THF, 25 mL); stirring speed (500 rpm).

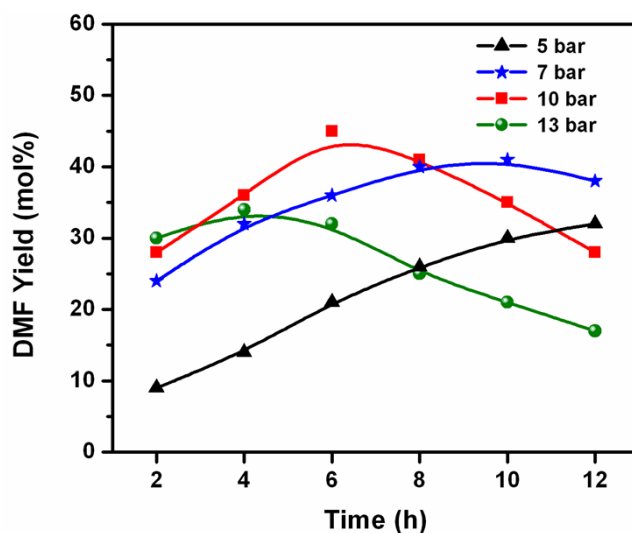

**Fig. S5** Effect of H<sub>2</sub> pressure on DMF yield over RH-1 catalyst under non-CTH conditions. Reaction conditions: HMF (1 mmol, 126 mg); catalyst (RH-1, 50 mg); temperature (220 °C); solvent (THF, 25 mL); stirring speed (500 rpm).

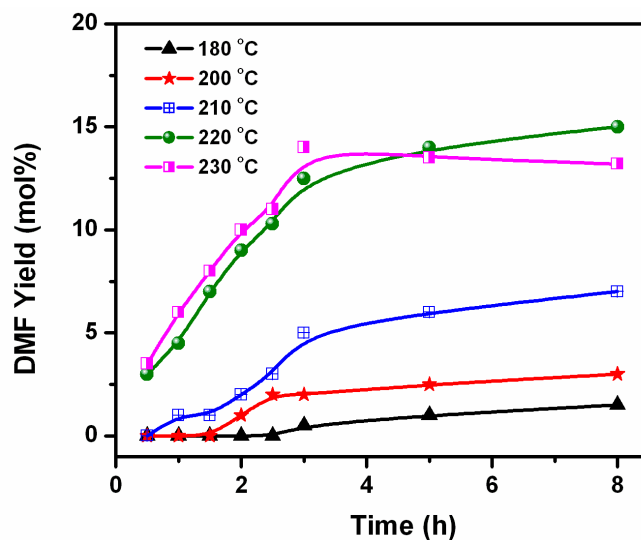

**Fig. S6** Effect of reaction temperature on CTH over RH-1 catalyst in the absence of H<sub>2</sub>. Reaction conditions: HMF (1 mmol, 126 mg); catalyst (RH-1, 50 mg); solvent (2-propanol, 25 mL); N<sub>2</sub> pressure (5 bar); stirring speed (500 rpm).

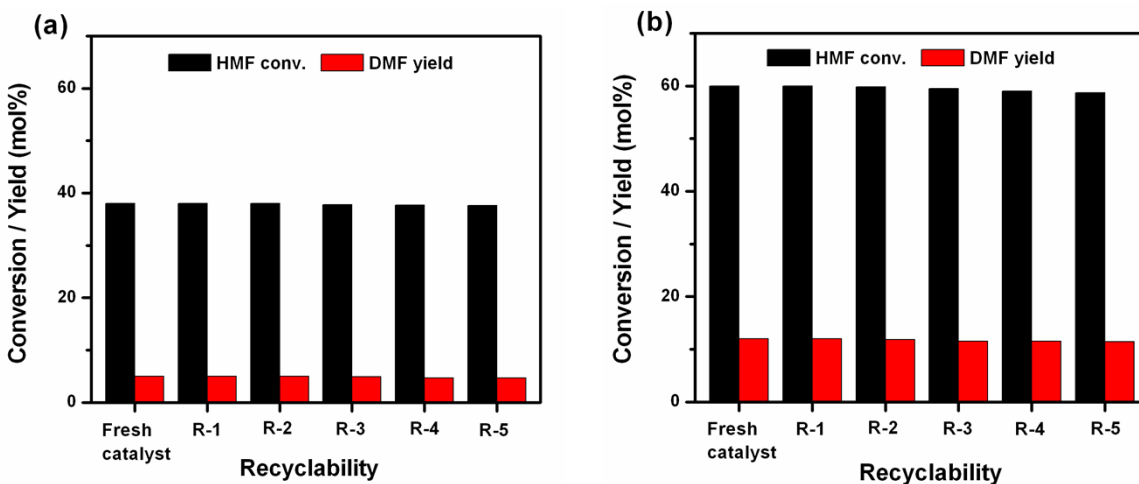

**Fig. S7** The recyclability experiments of RH-1 catalyst in HMF hydrogenolysis; (a) after 4 h of reaction and (b) after 8 h of reaction.

Reaction conditions: Solvent (2-propanol, 25 mL); molar ratio of HMF to Ru of 360; temperature (170 °C); H<sub>2</sub> pressure (10 bar); stirring speed (500 rpm).

**Table S1:** Metal surface area and Ru particle size.

| Catalyst | Metal surface area (m <sup>2</sup> /g) |           | Average Ru particle size (nm)      |           |
|----------|----------------------------------------|-----------|------------------------------------|-----------|
|          | From H <sub>2</sub> -chemisorption     | From TEM* | From H <sub>2</sub> -chemisorption | From TEM* |
| RH-1     | 0.97                                   | 0.88      | 2.8                                | 3.1       |
| RH-2     | 1.20                                   | 1.13      | 4.0                                | 4.3       |
| RH-3     | 0.56                                   | 0.58      | 12.9                               | 14        |

\*TEM-derived metal surface area calculated by assuming that the ruthenium particles are hemispherical in shape with the flat side on the support.
